# Supplementary material
Source: MDPI journal article supplement (https://www.mdpi.com/2073-4441/14/3/417)
Supplement: s1 [file s1]

**Table S1.** Genebank accession numbers, name, function and detailed primer information for the studied target and reference genes.

| Gene             | Accession number | Function                                           | Primers Sequence<br>(5'→3')                             | Final<br>Concentration<br>(nM) | Amplicon<br>Length<br>(bp) | Efficiency<br>(%) |
|------------------|------------------|----------------------------------------------------|---------------------------------------------------------|--------------------------------|----------------------------|-------------------|
| <i>5-ht1aa</i>   | NM_001123321.1   | Serotonin receptor                                 | F: ATGAGGATGAGCGGGATGTAG<br>R: CAATCAGCCAGGACCACG       | 300                            | 80                         | 125               |
| <i>5-ht2c</i>    | NM_001129893.1   | Serotonin receptor                                 | F: GCGCTCTCTGCTCTATTTGG<br>R: GTAGCGGTCGAGAGAAATGG      | 1000                           | 89                         | 126.4             |
| <i>abcb4</i>     | JQ014001         | ABC transporter                                    | F: TACTGATGATGCTTGGCTTAATC<br>R: TCTCTGGAAGGTGAAGTTAGG  | 300                            | 159                        | 110.6             |
| <i>abcc1</i>     | XM_002661199     | ABC transporter                                    | F: GCTCGAGCTCTCCTCAGAAA<br>R: TCGGATGGTGGACTGTATCA      | 300                            | 99                         | 125.1             |
| <i>abcc2</i>     | NM_200589        | ABC transporter                                    | F: GCACAGCATCAAGGGAAACA<br>R: CCTCATCCACTGAAGAACCGA     | 300                            | 87                         | 116.5             |
| <i>abcg2a</i>    | NM_001042775.1   | ABC transporter                                    | F: AAGGGTATCGAGGACCGTCT<br>R: AATCCTGACCCTGAACGATG      | 300                            | 97                         | 113.1             |
| <i>adra2a</i>    | NM_207637.2      | Norepinephrine receptor                            | F: AGCGTTTTGTGACTGCTGTG<br>R: TAATGGGATTGAGGGAGCTG      | 300                            | 86                         | 114               |
| <i>adra2b</i>    | NM_207638.1      | Norepinephrine receptor                            | F: GTCTGCCTGGCCACACTAAT<br>R: GTACGGGGCGAGTTTATCA       | 1000                           | 80                         | 119.7             |
| <i>adra2c</i>    | NM_207639.1      | Norepinephrine receptor                            | F: CTATTCTCCGCCACCATT<br>R: CCAGCACATCCCCACTATT         | 1000                           | 80                         | 133.8             |
| <i>ahr2</i>      | NM_001007789.2   | Aryl hydrocarbon nuclear receptor                  | F: TTCTGTTGCCGATTGAGATG<br>R: CTTGTTTTGCCCATGGAGAT      | 300                            | 96                         | 113.8             |
| <i>cat</i>       | NM_130912.1      | Antioxidant enzyme                                 | F: CAGGAGCGTTTGGCTACTTC<br>R: ATCGGTGTCGTCTTCCAAC       | 300                            | 91                         | 113               |
| <i>Cu/Zn sod</i> | Y12236           | Antioxidant enzyme                                 | F: GTCGTCTGGCTGTGAGAGTG<br>R: TGTCAGCGGGCTAGTGCTT       | 300                            | 113                        | 110               |
| <i>cyp1a1</i>    | NM_131879.1      | Phase I biotransformation enzyme                   | F: AACTCTTCGCAGGTGCTCAT<br>R: ACAAATGCCATTGGAGACC       | 300                            | 97                         | 102               |
| <i>cyp3a65</i>   | NM_001037438.1   | Phase I biotransformation enzyme                   | F: TGACCTGCTGAACCTCTCT<br>R: AAGGGCGAAAATCCATCTCT       | 300                            | 82                         | 91                |
| <i>dat</i>       | NM_131755.1      | Dopamine transporter                               | F: ACGTCAATTCTCTTTGGAGT<br>R: TCCTCGATATCATCACTGAA      | 150                            | 86                         | 97                |
| <i>drd1b</i>     | NM_001135976.2   | Dopamine receptor                                  | F: CTGCGACTCCAGCCTTAATC<br>R: AGATGCGGGTGTAAGTGACC      | 600                            | 98                         | 117.2             |
| <i>drd2b</i>     | NM_197936.1      | Dopamine receptor                                  | F: ACGCCGAATATCAGTCCAAC<br>R: GCAGTGCCTGAGTTTCAACA      | 300                            | 96                         | 110.7             |
| <i>gstπ</i>      | NM_131734        | Phase II biotransformation enzyme                  | F: TCTGGACTCTTTCCCGTCTCTCAA<br>R: ATTCACTGTTGCCGTTGCCGT | 300                            | 105                        | 119               |
| <i>mao</i>       | NM_212827.2      | Monoamine oxidase                                  | F: ACCAACTCAAAACCGCATTC<br>R: GTAGGCAAAAAGGTTCCACA      | 300                            | 151                        | 105               |
| <i>net</i>       | XM_689046.5      | Norepinephrine transporter                         | F: AGTCCAGCGTTCTTGCTGTT<br>R: TCTGCCAGTATGGGAAAAC       | 300                            | 92                         | 117               |
| <i>ppara</i>     | NM_001161333.1   | Peroxisome proliferator activated nuclear receptor | F: CATCTTGCCTTGACAGACATT<br>R: CACGCTCACTTTTCATTTCAC    | 600                            | 81                         | 88.3              |
| <i>pparβ</i>     | AF342937.1       | Peroxisome proliferator activated nuclear receptor | F: GCGTAAGCTAGTCGCAGGTC<br>R: TGCACCAGAGAGTCCATGTC      | 600                            | 204                        | 81.6              |
| <i>ppary</i>     | DQ839547.1       | Peroxisome proliferator activated nuclear receptor | F: GGTTCATTACGCGTTCAC<br>R: TGGTTCACGTCACTGGAGAA        | 600                            | 250                        | 87                |
| <i>pxr</i>       | DQ069792.1       | Pregnane X nuclear receptor                        | F: CTTTTTCAGACGTGCGATGA<br>R: TTGGCACTGTCTTCTGTTGC      | 300                            | 94                         | 112.7             |
| <i>raraa</i>     | NM_131406.2      | Retinoic acid nuclear receptor                     | F: GTAGTGGAGTGTGGATGTGAA<br>R: GTGCTGATGTCTGATGGATGA    | 300                            | 118                        | 108.7             |
| <i>rarab</i>     | NM_131399.1      | Retinoic acid nuclear receptor                     | F: ATGGATTACTACCACCAGAAC<br>R: TCTCCACAGAGTGATTCCGAGC   | 300                            | 115                        | 109.4             |
| <i>rarga</i>     | NM_131339.1      | Retinoic acid nuclear receptor                     | F: CCCGCCAACTGTACGATGTCA<br>R: GGGTCCAGTCCAGCATAGAAA    | 300                            | 79                         | 117.6             |
| <i>rxraa</i>     | NM_001161551.1   | Retinoid X receptor                                | F: ATTCAATGGCATCTCCTG<br>R: GCGGCTTAATATCCTCTG          | 600                            | 99                         | 101.8             |

|                                  |                |                                 |                                                           |     |     |       |
|----------------------------------|----------------|---------------------------------|-----------------------------------------------------------|-----|-----|-------|
| <i>rxrab</i>                     | NM_131153.1    | Retinoid X receptor             | F: CGCCGCATCAAATCACATAAAC<br>R: TGAATGGGTTGGACAGTATTAGC   | 300 | 87  | 109.4 |
| <i>rxrbb</i>                     | NM_131238.1    | Retinoid X receptor             | F: TCACAACTTGGGCGTGGAGGC<br>R: CGCATCTTGACAGACCAGCTCAG    | 300 | 105 | 100.7 |
| <i>rxrga</i>                     | NM_131217.2    | Retinoid X receptor             | F: ATCTCAGTTCTTCGTTGCAGGTAG<br>R: CGTTGATGATGGATGGGTGATGG | 300 | 105 | 99.6  |
| <i>rxrgb</i>                     | NM_001002345.1 | Retinoid X receptor             | F: CGCGGAATGGATACTCACG<br>R: GCTGATGACGGACGGATGAC         | 300 | 114 | 97.7  |
| <i>serta</i> /<br><i>slc6a4a</i> | NM_001039972.1 | Serotonin transporter           | F: CATCTATGCTGAGGCTATTG<br>R: AAGAATATGATGGCGAAGA         | 300 | 73  | 100   |
| <i>vmat2</i>                     | NM_001256225.2 | Vesicular monoamine transporter | F: CTA AAAAGCTCCGCATCCAG<br>R: TGTCCAAGAGCAAAGCAATG       | 150 | 231 | 133   |
| <i>actb1</i>                     | NM_131031.1    | Reference gene                  | F: TCCCAAAGCCAACAGAGAGAAG<br>R: GTCACACCATCACCAGAGTCC     | 10  | 147 | 100.5 |
| <i>efl</i>                       | NM_131263.1    | Reference gene                  | F: GGACACAGAGACTTCATCAAGAAC<br>R: ACCAACACCAGCAGCAACGT    | 300 | 84  | 116.8 |
| <i>rpl8</i>                      | NM_200713.1    | Reference gene                  | F: CAATGACGACCCGACCG<br>R: CGCCAGCAACTCAGTCACT            | 10  | 136 | 96    |

| Gene                          | F(4,15) | p         |
|-------------------------------|---------|-----------|
| <b>Cluster e</b>              |         |           |
| <i>cyp3a65</i>                | 5.309   | 0.007     |
| <i>drd2b</i>                  | 6.791   | 0.003     |
| <i>dat</i>                    | 23.323  | <0.000001 |
| <i>mao</i>                    | 9.44    | 0.001     |
| <i>5-HT1a</i>                 | 2.74    | 0.068     |
| <b>Cluster g</b>              |         |           |
| <i>net</i>                    | 0.792   | 0.548     |
| <i>serta</i>                  | 5.115   | 0.008     |
| <i>ppar<math>\beta</math></i> | 8.198   | 0.001     |
| <i>ahr2</i>                   | 6.305   | 0.003     |
| <b>Cluster h</b>              |         |           |
| <i>abcc2</i>                  | 6.512   | 0.003     |
| <i>gst</i>                    | 3.654   | 0.029     |
| <i>rarab</i>                  | 19.45   | <0.000001 |
| <i>raraa</i>                  | 2.182   | 0.121     |
| <i>rarga</i>                  | 24.729  | <0.000001 |
| <i>rxrga</i>                  | 11.348  | <0.000001 |
| <i>rxraa</i>                  | 7.282   | 0.002     |
| <i>5-HT2c</i>                 | 7.547   | 0.002     |
| <i>drd1b</i>                  | 2.568   | 0.081     |

| Nominal concentration (ng/L) | Real concentration (ng/L) | Recovery (%) | Sampling time | Media replacement | Quantification method | Reference |
|------------------------------|---------------------------|--------------|---------------|-------------------|-----------------------|-----------|
| racemic-fluoxetine           |                           |              |               |                   |                       |           |

|                               |                     |                 |                  |              |                    |      |
|-------------------------------|---------------------|-----------------|------------------|--------------|--------------------|------|
| 100                           | 94.6<br>(46.4+48.2) | >80%            | Every<br>renewal | Daily        | UPLC-ESI-<br>MS/MS | [29] |
| <b>fluoxetine</b>             |                     |                 |                  |              |                    |      |
| 100                           | 104                 |                 |                  |              |                    |      |
| 1000                          | 1000                |                 |                  |              |                    |      |
| 10000                         | 9830                | Not<br>reported | 24 hours         | Daily        | LC-MS/MS           | [44] |
| 100000                        | 94300               |                 |                  |              |                    |      |
| 1000000                       | 971000              |                 |                  |              |                    |      |
| 500                           | 440                 |                 |                  |              |                    |      |
| 10000                         | 8720                | >87%            | Daily            | Daily        | UPLC-MS/MS         | [45] |
| <b>(s)-fluoxetine</b>         |                     |                 |                  |              |                    |      |
| 100                           | 105.4               | >80%            | Every<br>renewal | Daily        | UPLC-ESI-<br>MS/MS | [29] |
| <b>(r)-fluoxetine</b>         |                     |                 |                  |              |                    |      |
| 100                           | 89.4                | >80%            | Every<br>renewal | Daily        | UPLC-ESI-<br>MS/MS | [29] |
| <b>(s)-norfluoxetine</b>      |                     |                 |                  |              |                    |      |
| 3500                          |                     | 62.5            |                  |              |                    |      |
| 15000                         | Not reported        | 84.1            | day 1, 2 and 3   | Not reported | SPE-HPLC-FD        | [46] |
| 28000                         |                     | 91.1            |                  |              |                    |      |
| <b>(r)-norfluoxetine</b>      |                     |                 |                  |              |                    |      |
| 3500                          |                     | 99.1            |                  |              |                    |      |
| 15000                         | Not reported        | 102             | day 1, 2 and 3   | Not reported | SPE-HPLC-FD        | [46] |
| 28000                         |                     | 103             |                  |              |                    |      |
| <b>racemic- norfluoxetine</b> |                     |                 |                  |              |                    |      |
| 100                           | 102<br>(46.4+48.2)  | >80%            | Every<br>renewal | Daily        | UPLC-ESI-<br>MS/MS | [29] |

The above mentioned studies were conducted under controlled laboratorial conditions. UPLC-ESI-MS/MS, ultra-performance liquid chromatography-electrospray tandem mass spectrometry; LC-MS/MS, liquid chromatography tandem mass spectrometry; UPLC-MS/MS,

ultra-performance liquid chromatography tandem mass spectrometry; SPE-HPLC-FD, Solid-phase extraction with high-performance liquid chromatography coupled with Chirobiotic V and fluorescence detection
